# Supplementary material for: Hammerhead-type FXR agonists induce an enhancer RNA Fincor that ameliorates nonalcoholic steatohepatitis in mice
Source: eLife. 2024 Apr 15;13:RP91438. doi: 10.7554/eLife.91438 (PMC11018349; doi:10.7554/eLife.91438)
Supplement: Supplementary file 1. [file elife-91438-supp1.xlsx]

## Sheet: Supplementary File 1a
Sequencing data generated in this study
Name	Total reads	Uniquely mapped reads
WT Liver Veh RNA-Seq rep1	50887391	38072659
WT Liver GW RNA-Seq rep1	54020150	40595856
WT Liver Veh RNA-Seq rep2	51268164	38898913
WT Liver GW RNA-Seq rep2	51899892	39487241
Flox Liver Veh GRO-Seq	62960996	30305910
Flox Liver GW GRO-Seq	59210073	26116795
FXR KO Liver Veh GRO-Seq	34153537	14379417
FXR KO Liver GW GRO-Seq	36430101	15008281
WT Liver RNA-Seq rep1	96262381	81801494
WT Liver RNA-Seq rep2	104979915	88365481
Fincor KD Liver RNA-Seq rep1	91654076	75346167
Fincor KD Liver RNA-Seq rep2	90211420	74745807

## Sheet: Supplementary File 1b
Chr	Start	End	Annotation	Detailed Annotation	Distance to TSS	Nearest PromoterID	Entrez ID	Nearest Unigene	Nearest Refseq	Nearest Ensembl	Gene Name	Gene Alias	Gene Description	Gene Type	dmso vs. gw Log2 Fold Change	dmso vs. gw p-value	dmso vs. gw adj. p-value
chr19	17308448	17315441	Intergenic	Intergenic	27561	NM_001136484	14537	Mm.244825	NM_010265	ENSMUSG00000038843	Gcnt1	5630400D21Rik|B130048E03|C2 GlcNAcT|C2GNT|IGnT	glucosaminyl (N-acetyl) transferase 1, core 2	protein-coding	3.13258	5.39e-33	1.02e-30
chr16	29988698	29995332	Intergenic	L2a|LINE|L2	-12891	NR_037689	328657	Mm.425982	NM_001033403	ENSMUSG00000075286	Gm1968	-	predicted gene 1968	ncRNA	6.07537	1.38e-25	1.31e-23
chr19	38361105	38368651	Intergenic	Intergenic	-31102	NM_175507	240660	Mm.262085	NM_175507	ENSMUSG00000044026	Slc35g1	AA590464|D330039I19Rik|Tmem20	solute carrier family 35, member G1	protein-coding	2.53728	2.4e-24	1.52e-22
chr19	38369936	38375935	Intergenic	Intergenic	-23045	NM_175507	240660	Mm.262085	NM_175507	ENSMUSG00000044026	Slc35g1	AA590464|D330039I19Rik|Tmem20	solute carrier family 35, member G1	protein-coding	2.27151	2.14e-18	1.02e-16
chr4	122968770	122974769	Intergenic	Intergenic	-10581	NM_029662	76574	Mm.331842	NM_029662	ENSMUSG00000028655	Mfsd2a	1700018O18Rik|Mfsd2|NLS1	major facilitator superfamily domain containing 2A	protein-coding	2.94743	2.97e-14	1.13e-12
chr9	61020101	61026100	Intergenic	Intergenic	6031	NR_040767	330956	Mm.207985	NR_040767	ENSMUSG00000111290	Gm5122	A430102L10	predicted gene 5122	ncRNA	2.4172	1.22e-08	3.87e-07
chr4	133567094	133573093	Intergenic	MER92B|LTR|ERV1	-4652	NM_172876	242691	Mm.40110	NM_172876	ENSMUSG00000028850	Gpatch3	D930035B09Rik|Gpatc3	G patch domain containing 3	protein-coding	2.66416	2.06e-08	4.9e-07
chr4	133556890	133562889	Intergenic	Intergenic	6513	NM_011850	23957	Mm.346759	NM_011850	ENSMUSG00000037583	Nr0b2	SHP|SHP-1|Shp1	nuclear receptor subfamily 0, group B, member 2	protein-coding	2.56803	2.03e-08	4.9e-07
chr11	102418146	102424995	Intergenic	Intergenic	-8937	NM_008175	14824	Mm.1568	NM_008175	ENSMUSG00000034708	Grn	GP88|PCDGF|PEPI|Pgrn|epithelin	granulin	protein-coding	2.57199	3.3e-08	6.97e-07
chr4	139328185	139338590	Intergenic	Intergenic	19189	NM_023536	69902	Mm.27871	NM_023536	ENSMUSG00000028741	Mrto4	2610012O22Rik|Mg684|Mrt4	mRNA turnover 4, ribosome maturation factor	protein-coding	-1.50872	9.44e-06	0.000179284
chr2	145672901	145679968	Intergenic	Intergenic	-24761	NR_033220	408057	Mm.486711	NR_033220	ENSMUSG00000001768	BC039771	-	cDNA sequence BC039771	ncRNA	1.34522	1.62e-05	0.000280026
chr6	90537401	90547323	Intergenic	Intergenic	-8431	NM_027406	107747	Mm.30035	NM_027406	ENSMUSG00000030088	Aldh1l1	1810048F20Rik|FDH|Fthfd|Neut2	aldehyde dehydrogenase 1 family, member L1	protein-coding	1.76788	1.81e-05	0.000286332
chr1	140012236	140022358	Intergenic	Intergenic	-158598	NM_001025575	545366	Mm.439660	NM_001025575	ENSMUSG00000033898	Cfhr2	Cfhrb_4/2|FHR-B	complement factor H-related 2	protein-coding	-0.800537	3.87e-05	0.000565299
chr15	82702764	82711454	Intergenic	Intergenic	-17051	NR_033515	627860	Mm.486636	NR_033515		Cyp2d37-ps	EG627860|Gm6800	cytochrome P450, family 2, subfamily d, polypeptide 37, pseudogene	pseudo	-0.51786	7.14e-05	0.000969458
chr13	4045460	4059203	Intergenic	Intergenic	-7260	NM_134072	105387	Mm.26838	NM_134072	ENSMUSG00000033715	Akr1c14	9030611N15Rik|AW557061	aldo-keto reductase family 1, member C14	protein-coding	-0.803842	0.000945724	0.0119792
chr13	52188285	52194284	Intergenic	Intergenic	94543	NR_045061	74050	Mm.84860	NR_045061	ENSMUSG00000113211	4921525O09Rik	-	RIKEN cDNA 4921525O09 gene	ncRNA	0.889809	0.00146745	0.017426
chr6	3179816	3186579	Intergenic	Intergenic	-105322	NR_036696	667335	Mm.380219	NR_036696	ENSMUSG00000106779	Gm8579	EG667335	spermatogenesis associated glutamate (E)-rich protein 4a pseudogene	pseudo	1.28394	0.00188651	0.0210846
chr8	46543115	46549946	Intergenic	Intergenic	-5539	NR_160798	71876	Mm.22108	NM_027973	ENSMUSG00000031629	Cenpu	1700029A22Rik|Mlf1ip	centromere protein U	protein-coding	1.12399	0.00207507	0.0219035
chr2	27621428	27630098	Intergenic	Intergenic	-51438	NM_011305	20181	Mm.24624	NM_011305	ENSMUSG00000015846	Rxra	9530071D11Rik|Nr2b1|RXRalpha1	retinoid X receptor alpha	protein-coding	-0.999696	0.0039071	0.039071
chr1	86036003	86043763	Intergenic	Intergenic	-5980	NM_001144993	72792	Mm.54981	NM_001144992	ENSMUSG00000026227	2810459M11Rik	-	RIKEN cDNA 2810459M11 gene	protein-coding	-0.826246	0.00468754	0.0445317
chr5	92539966	92545965	Intergenic	RLTR6B_Mm|LTR|ERV1	-28572	NM_001170571	384198	Mm.76757	NM_001033478	ENSMUSG00000057068	Fam47e	C730043O17|Gm1381	family with sequence similarity 47, member E	protein-coding	1.0766	0.00818448	0.0740501
chr2	158394067	158400797	Intergenic	RLTR27|LTR|ERVK	-12421	NM_001291138	228850	Mm.398185	NM_177227	ENSMUSG00000027652	Ralgapb	AI507211|B230339M05Rik|p170	Ral GTPase activating protein, beta subunit (non-catalytic)	protein-coding	-1.09138	0.00962135	0.0830935
chr3	57341061	57347852	Intergenic	Intergenic	-26945	NR_162799	114482876		NR_162799		Mir12195	mmu-mir-12195	microRNA mir-12195	ncRNA	0.487657	0.0141618	0.116989
chr12	103820782	103830731	Intergenic	Intergenic	37863	NM_009243	20700	Mm.439692	NM_009243	ENSMUSG00000066366	Serpina1a	Aat-2|Aat2|Dom1|PI1|Spi1-1|Spi1-3	serine (or cysteine) peptidase inhibitor, clade A, member 1A	protein-coding	-0.641787	0.0163224	0.121055
chr19	3081218	3087217	Intergenic	MMVL30-int|LTR|ERV1	113486	NR_045304	70011	Mm.393871	NR_045304	ENSMUSG00000100969	1700030N03Rik	1700087C08Rik	RIKEN cDNA 1700030N03 gene	ncRNA	0.757686	0.0184768	0.121055
chr1	73902698	73908697	Intergenic	Intergenic	-41231	NR_045311	109198	Mm.359721	NR_045311	ENSMUSG00000100301	6030407O03Rik	-	RIKEN cDNA 6030407O03 gene	ncRNA	1.14368	0.0170254	0.121055
chr1	139894907	139900906	Intergenic	L1_Mus3|LINE|L1	-39207	NM_001025575	545366	Mm.439660	NM_001025575	ENSMUSG00000033898	Cfhr2	Cfhrb_4/2|FHR-B	complement factor H-related 2	protein-coding	-0.815269	0.018472	0.121055
chr3	57332925	57338924	Intergenic	Intergenic	-18413	NR_162799	114482876		NR_162799		Mir12195	mmu-mir-12195	microRNA mir-12195	ncRNA	0.536238	0.0173295	0.121055
chr19	32523606	32530768	Intergenic	L1M5|LINE|L1	41418	NM_010799	17330	Mm.255116	NM_010799	ENSMUSG00000024896	Minpp1	AA408516	multiple inositol polyphosphate histidine phosphatase 1	protein-coding	-0.805815	0.0159138	0.121055
chr5	87369913	87383257	Intergenic	Intergenic	-39390	NM_028094	72094	Mm.482739	NM_028094	ENSMUSG00000035780	Ugt2a3	2010321J07Rik	UDP glucuronosyltransferase 2 family, polypeptide A3	protein-coding	-0.537024	0.0193204	0.121145
chr1	67111691	67119306	Intergenic	Intergenic	-7529	NM_001080809	227231	Mm.343942	NM_001080809	ENSMUSG00000025991	Cps1	4732433M03Rik|CPS|D1Ucla3	carbamoyl-phosphate synthetase 1	protein-coding	-0.429979	0.0197658	0.121145
chr15	99887769	99893768	Intergenic	Intergenic	-15312	NM_001113545	65970	Mm.33207	NM_023063	ENSMUSG00000023022	Lima1	Eplin	LIM domain and actin binding 1	protein-coding	-0.924175	0.0272252	0.161649
chr10	24839422	24845421	Intergenic	MTD-int|LTR|ERVL-MaLR	-6226	NM_134005	209558	Mm.338425	NM_134005	ENSMUSG00000019989	Enpp3	AI876438|CD203c	ectonucleotide pyrophosphatase/phosphodiesterase 3	protein-coding	-0.913226	0.0407559	0.234655
chr13	74556993	74562992	Intergenic	Intergenic	-66042	NM_146231	235956		NM_146231	ENSMUSG00000069208	Zfp825	-	zinc finger protein 825	protein-coding	-0.926255	0.0448298	0.250519
chr14	36998213	37004212	Intergenic	B4A|SINE|B4	-32448	NM_027045	72972	Mm.27621	NM_027045	ENSMUSG00000058690	Ccser2	1700012P13Rik|2900054P12Rik|AI035535|AW108503|Fam190b|Gcap14	coiled-coil serine rich 2	protein-coding	-0.520953	0.0504663	0.27396
chr4	141556353	141562352	Intergenic	Intergenic	13190	NR_030695	320456	Mm.32859	NM_177163		B330016D10Rik	-	RIKEN cDNA B330016D10 gene	ncRNA	0.720347	0.0627071	0.330954
chr18	60249196	60255195	Intergenic	Intergenic	21072	NM_001034859	225594	Mm.329460	NM_001034859	ENSMUSG00000068606	Gm4841	EG225594|Ifgga3	predicted gene 4841	protein-coding	-0.379747	0.0803265	0.412487
chr13	74504881	74510880	Intergenic	ORR1A4-int|LTR|ERVL-MaLR	-13930	NM_146231	235956		NM_146231	ENSMUSG00000069208	Zfp825	-	zinc finger protein 825	protein-coding	-0.780396	0.0833152	0.416576
chr15	85680329	85686328	Intergenic	Intergenic	-20445	NR_110483	102800312	Mm.33117	NR_110483		Lncppara	Lincppara|Mirlet7bhg|linc-Ppara	long noncoding RNA near Ppara	ncRNA	-0.567673	0.0922479	0.449413
chr12	7873447	7879446	Intergenic	RMER19B|LTR|ERVK	-101231	NM_009693	238055	Mm.221239	NM_009693	ENSMUSG00000020609	Apob	AI315052|Apo B-100|apob-100|apob-48	apolipoprotein B	protein-coding	0.504243	0.0995904	0.462817
chr3	87005756	87015281	Intergenic	Lx7|LINE|L1	-11178	NM_007639	12479	Mm.1894	NM_007639	ENSMUSG00000028076	Cd1d1	AI747460|CD1.1|Cd1a|Cd1d|Ly-38	CD1d1 antigen	protein-coding	-0.460462	0.099871	0.462817
chr17	3236435	3250246	Intergenic	Intergenic	-83233	NM_001122998	24001	Mm.137134	NM_011878	ENSMUSG00000023800	Tiam2	3000002F19Rik|STEF|mKIAA2016	T cell lymphoma invasion and metastasis 2	protein-coding	-0.398077	0.116182	0.509906
chr9	89261432	89268080	Intergenic	L1MB3|LINE|L1	53372	NM_001359993	107885	Mm.486274	NM_026829	ENSMUSG00000066442	Mthfs	1110034I12Rik|2310020H23Rik|AI119695	5, 10-methenyltetrahydrofolate synthetase	protein-coding	0.509811	0.114472	0.509906
chr11	5488426	5495397	Intergenic	Intergenic	-28730	NM_013842	22433	Mm.469937	NM_013842	ENSMUSG00000020484	Xbp1	D11Ertd39e|TREB-5|TREB5|XBP-1	X-box binding protein 1	protein-coding	-0.558147	0.118083	0.509906
chr18	87753395	87759394	Intergenic	Intergenic	1044083	NM_001361145	12405	Mm.70775	NM_172633	ENSMUSG00000024647	Cbln2	6330593N19Rik|A730004O05	cerebellin 2 precursor protein	protein-coding	0.27784	0.12123	0.511861
chr18	38181890	38188662	Intergenic	Intergenic	24486	NM_029357	75599	Mm.36560	NM_029357	ENSMUSG00000051375	Pcdh1	2010005A06Rik|AI585920	protocadherin 1	protein-coding	-0.374035	0.137447	0.567715
chr8	10888561	10895360	Intergenic	Intergenic	-7962	NR_102285	71624	Mm.139075	NR_102285	ENSMUSG00000109089	4833411C07Rik	-	RIKEN cDNA 4833411C07 gene	ncRNA	-0.408431	0.154184	0.623297
chr7	46835237	46842219	Intergenic	(CAAAA)n|Simple_repeat|Simple_repeat	-7076	NM_010699	16828	Mm.29324	NM_010699	ENSMUSG00000063229	Ldha	Ldh1|Ldhm|l7R2	lactate dehydrogenase A	protein-coding	0.538002	0.161202	0.625069
chr11	101680437	101686436	Intergenic	RSINE1|SINE|B4	17895	NM_025404	80981	Mm.266840	NM_025404	ENSMUSG00000034936	Arl4d	1110036H21Rik|ARL6|AW456149|Arf4l|Arfl4|Arl5	ADP-ribosylation factor-like 4D	protein-coding	-0.465631	0.160918	0.625069
chr3	95632808	95639448	Intergenic	Intergenic	11148	NM_019561	56205	Mm.241365	NM_019561	ENSMUSG00000038619	Ensa	1700020C18Rik|2610007F17Rik|AI451924	endosulfine alpha	protein-coding	0.55729	0.168517	0.640365
chr6	149219262	149226686	Intergenic	RMER12B|LTR|ERVK	-34262	NR_153963	232566	Mm.209147	NM_001113424	ENSMUSG00000068250	Amn1	5830467E07Rik|A230083D09|C730024G19Rik	antagonist of mitotic exit network 1	protein-coding	0.478398	0.180742	0.673352
chr15	85666300	85674740	Intergenic	CpG	-33253	NR_110483	102800312	Mm.33117	NR_110483		Lncppara	Lincppara|Mirlet7bhg|linc-Ppara	long noncoding RNA near Ppara	ncRNA	-0.382396	0.20288	0.733699
chr8	40650425	40658676	Intergenic	RSINE1|SINE|B4	-19758	NM_001040699	54384	Mm.294871	NM_019433	ENSMUSG00000039431	Mtmr7	-	myotubularin related protein 7	protein-coding	-0.489926	0.204663	0.733699
chr13	75776961	75783561	Intergenic	Intergenic	-59624	NM_001360151	93692	Mm.25844	NM_053108	ENSMUSG00000021591	Glrx	C86710|D13Wsu156e|Glrx1|Grx1|TTase	glutaredoxin	protein-coding	-0.317683	0.230519	0.769217
chr3	138405570	138412885	Intergenic	Intergenic	-6270	NM_011996	26876	Mm.158750	NM_011996	ENSMUSG00000037797	Adh4	Adh2	alcohol dehydrogenase 4 (class II), pi polypeptide	protein-coding	0.425252	0.228103	0.769217
chr15	75398334	75404333	Intergenic	RMER17D2|LTR|ERVK	30496	NR_108041	105892	Mm.38909	NM_001039720	ENSMUSG00000053168	9030619P08Rik	-	lymphocyte antigen 6 complex pseudogene	pseudo	-0.438814	0.220496	0.769217
chr8	10908165	10915265	Intergenic	Intergenic	11793	NR_102285	71624	Mm.139075	NR_102285	ENSMUSG00000109089	4833411C07Rik	-	RIKEN cDNA 4833411C07 gene	ncRNA	0.337941	0.230765	0.769217
chr12	72617828	72624333	Intergenic	Intergenic	43748	NM_025522	66375	Mm.289653	NM_025522	ENSMUSG00000021094	Dhrs7	2310016E22Rik|5730564L20Rik|AW061210|Retdsr4|Retsdr4	dehydrogenase/reductase (SDR family) member 7	protein-coding	-0.313548	0.243896	0.790138
chr12	59191847	59197846	Intergenic	B3A|SINE|B2	24637	NM_001033156	70611	Mm.311026	NM_001033156	ENSMUSG00000035329	Fbxo33	5730501N20Rik|AI642135	F-box protein 33	protein-coding	-0.49877	0.245359	0.790138
chr15	99900493	99910571	Intergenic	Intergenic	26126	NM_028180	72277	Mm.61024	NM_028180	ENSMUSG00000045350	Fam186a	1700030F18Rik|Gm920	family with sequence similarity 186, member A	protein-coding	-0.415977	0.256696	0.799544
chr12	71362783	71369682	Intergenic	Intergenic	17976	NR_136902	67348	Mm.54261	NR_136902	ENSMUSG00000100668	1700083H02Rik	100041190|Gm3190	RIKEN cDNA 1700083H02 gene	ncRNA	-0.459299	0.254043	0.799544
chr4	96619444	96626846	Intergenic	PB1D11|SINE|Alu	-31660	NM_028979	74519	Mm.458387	NM_028979	ENSMUSG00000015224	Cyp2j9	8430417E17Rik	cytochrome P450, family 2, subfamily j, polypeptide 9	protein-coding	0.154635	0.272444	0.821657
chr13	55186813	55193733	Intergenic	CpG	-19509	NM_008739	18193	Mm.168965	NM_008739	ENSMUSG00000021488	Nsd1	AI528500|KMT3B	nuclear receptor-binding SET-domain protein 1	protein-coding	0.310101	0.269619	0.821657
chr1	139567915	139574700	Intergenic	LTRIS_Mus|LTR|ERV1	-11085	NM_015780	50702	Mm.220362	NM_015780	ENSMUSG00000057037	Cfhr1	AI194696|CFHRB|Cfhl1	complement factor H-related 1	protein-coding	-0.3746	0.317173	0.941607
chr12	7907259	7914337	Intergenic	Intergenic	-66879	NM_009693	238055	Mm.221239	NM_009693	ENSMUSG00000020609	Apob	AI315052|Apo B-100|apob-100|apob-48	apolipoprotein B	protein-coding	0.144438	0.458411	0.944991
chr12	7935123	7941122	Intergenic	L1Md_A|LINE|L1	-39555	NM_009693	238055	Mm.221239	NM_009693	ENSMUSG00000020609	Apob	AI315052|Apo B-100|apob-100|apob-48	apolipoprotein B	protein-coding	0.204644	0.459521	0.944991
chr1	172782944	172789725	Intergenic	Intergenic	88278	NM_007768	12944	Mm.28767	NM_007768	ENSMUSG00000037942	Crp	AI255847	C-reactive protein, pentraxin-related	protein-coding	0.147826	0.523441	0.944991
chr8	115693859	115701933	Intergenic	Intergenic	8998	NM_001025577	17132	Mm.275549	NM_001025577	ENSMUSG00000055435	Maf	2810401A20Rik|A230108G15Rik|AW047063|c-maf	avian musculoaponeurotic fibrosarcoma oncogene homolog	protein-coding	-0.182225	0.528806	0.944991
chr3	5857543	5863542	Intergenic	LSU-rRNA_Hsa|rRNA|rRNA	-284294	NM_001163306	19302	Mm.132336	NM_008994	ENSMUSG00000040374	Pex2	D3Ertd138e|PAF-1|PMP35|Pxmp3	peroxisomal biogenesis factor 2	protein-coding	-0.171163	0.463011	0.944991
chr13	55180596	55186595	Intergenic	Intergenic	-26187	NM_008739	18193	Mm.168965	NM_008739	ENSMUSG00000021488	Nsd1	AI528500|KMT3B	nuclear receptor-binding SET-domain protein 1	protein-coding	0.156954	0.67615	0.944991
chr11	95768338	95774337	Intergenic	Intergenic	22270	NM_201609	268469	Mm.389038	NM_201609	ENSMUSG00000075595	Zfp652	9530033F24Rik|ZNF652	zinc finger protein 652	protein-coding	-0.092327	0.624148	0.944991
chr3	113588507	113594506	Intergenic	Intergenic	-13756	NM_001110505	11722	Mm.439727	NM_007446	ENSMUSG00000074264	Amy1	Amy-1|Amy1a|C030014B17Rik	amylase 1, salivary	protein-coding	0.267687	0.499679	0.944991
chr8	119892258	119898257	Intergenic	RLTR4_MM-int|LTR|ERV1	-15103	NM_009462	22224	Mm.256910	NM_009462	ENSMUSG00000031826	Usp10	2610014N07Rik|UBPO|Uchrp|mKIAA0190	ubiquitin specific peptidase 10	protein-coding	0.312419	0.379728	0.944991
chr3	78964189	78970188	Intergenic	GC_rich|Low_complexity|Low_complexity	178558	NM_001310536	76089	Mm.31220	NM_001099624	ENSMUSG00000062232	Rapgef2	5830453M24Rik|CNRasGEF|Pdzgef1|RA-GEF-1|mKIAA0313|nRapGEP	Rap guanine nucleotide exchange factor (GEF) 2	protein-coding	0.186056	0.66008	0.944991
chr1	133930963	133937863	Intergenic	Intergenic	-13012	NM_054077	116847	Mm.214514	NM_054077	ENSMUSG00000041577	Prelp	7330409J17Rik|SLRR2A	proline arginine-rich end leucine-rich repeat	protein-coding	0.348476	0.329744	0.944991
chr17	35474766	35480765	Intergenic	RMER19C|LTR|ERVK	7676	NM_010391	15007	Mm.88795	NM_010391	ENSMUSG00000067235	H2-Q10	H-2Q10|H2-K1|Q10|Qa10	histocompatibility 2, Q region locus 10	protein-coding	0.144972	0.482585	0.944991
chr7	80984426	80990425	Intergenic	B1_Mus2|SINE|Alu	-6259	NM_178707	233410	Mm.29525	NM_178707	ENSMUSG00000005621	Zfp592	A730014M16Rik|Znf592	zinc finger protein 592	protein-coding	-0.260412	0.528238	0.944991
chr8	27246219	27252218	Intergenic	ORR1C2|LTR|ERVL-MaLR	-11109	NM_007918	13685	Mm.6700	NM_007918	ENSMUSG00000031490	Eif4ebp1	4e-bp1|AA959816|PHAS-I	eukaryotic translation initiation factor 4E binding protein 1	protein-coding	-0.294505	0.529345	0.944991
chr7	132922802	132928801	Intergenic	Intergenic	-5375	NM_207302	360216	Mm.389984	NM_207302	ENSMUSG00000030967	Zranb1	9330160G10Rik|D7Wsu87e|Gm1956|Trabid	zinc finger, RAN-binding domain containing 1	protein-coding	-0.391749	0.374154	0.944991
chr5	5780432	5786431	Intergenic	Intergenic	-34114	NM_027399	70358	Mm.85429	NM_027399	ENSMUSG00000015652	Steap1	2410007B19Rik|Prss24|Steap	six transmembrane epithelial antigen of the prostate 1	protein-coding	-0.129202	0.680261	0.944991
chr11	48750675	48756674	Intergenic	CpG	-46686	NM_008143	14694	Mm.5305	NM_008143	ENSMUSG00000020372	Rack1	AL033335|GB-like|Gnb2-rs1|Gnb2l1|p205	receptor for activated C kinase 1	protein-coding	0.182073	0.537826	0.944991
chr2	118555239	118561238	Intergenic	IAPLTR2_Mm|LTR|ERVK	-8552	NM_138313	171543	Mm.210125	NM_138313	ENSMUSG00000040093	Bmf	AW260063|AW411872	BCL2 modifying factor	protein-coding	-0.399466	0.403368	0.944991
chr11	86810416	86816926	Intergenic	MMVL30-int|LTR|ERV1	-6011	NM_026191	67487	Mm.260627	NM_026191	ENSMUSG00000018425	Dhx40	2410016C14Rik|ARG147|DDX40|PAD	DEAH (Asp-Glu-Ala-His) box polypeptide 40	protein-coding	0.137668	0.456024	0.944991
chr9	74893797	74900217	Intergenic	Lx8|LINE|L1	35086	NM_008262	15379	Mm.303355	NM_008262	ENSMUSG00000043013	Onecut1	D9Ertd423e|HNF-6|Hfh12|Hnf6|Hnf6b|OC-1|Oc1	one cut domain, family member 1	protein-coding	1.00249	0.365432	0.944991
chr8	126656740	126669390	Intergenic	Intergenic	-69079	NM_001164598	270110	Mm.334918	NM_001164598	ENSMUSG00000051495	Irf2bp2	E130305N23Rik|IRF-2BP2	interferon regulatory factor 2 binding protein 2	protein-coding	0.118439	0.657951	0.944991
chr1	39588494	39595611	Intergenic	Intergenic	-14705	NM_001033135	67702	Mm.28614	NM_001033135	ENSMUSG00000048234	Rnf149	1600023E10Rik|AV037261|C76763|Gm15832|Greul4	ring finger protein 149	protein-coding	-0.214496	0.55164	0.944991
chr12	24635918	24645785	Intergenic	B2_Mm2|SINE|B2	-10520	NM_178357	194655	Mm.9616	NM_178357	ENSMUSG00000020653	Klf11	9830142A17|D12Ertd427e|Tieg2|Tieg2b|Tieg3	Kruppel-like factor 11	protein-coding	0.106897	0.586545	0.944991
chr18	64330148	64336147	Intergenic	Intergenic	-7217	NM_194268	225631	Mm.234723	NM_194268	ENSMUSG00000045991	Onecut2	C730009D12|OC-2|Oc2	one cut domain, family member 2	protein-coding	0.419669	0.359022	0.944991
chr17	3207151	3213150	Intergenic	Intergenic	95178	NM_134123	106583	Mm.124373	NM_134123	ENSMUSG00000046201	Scaf8	A630086M08Rik|A930036P18Rik|AA408306|AI447644|AI448652|AU015035|Rbm16|mKIAA1116	SR-related CTD-associated factor 8	protein-coding	-0.191679	0.531137	0.944991
chr9	35036935	35043255	Intergenic	Intergenic	-76633	NR_029475	78934	Mm.391688	NR_029475	ENSMUSG00000070315	4930581F22Rik	-	RIKEN cDNA 4930581F22 gene	ncRNA	-0.357196	0.39201	0.944991
chr11	51914086	51920085	Intergenic	Intergenic	-50546	NM_029976	52626	Mm.289456	NM_029976	ENSMUSG00000020392	Cdkn2aipnl	A430101B06Rik|AA409260|D11Ertd497e|MNCb-1520	CDKN2A interacting protein N-terminal like	protein-coding	0.235939	0.583589	0.944991
chr1	153617607	153623606	Intergenic	Intergenic	-32431	NM_026380	67792	Mm.379143	NM_026380	ENSMUSG00000042671	Rgs8	6530413N01Rik	regulator of G-protein signaling 8	protein-coding	-0.12761	0.583183	0.944991
chr1	23253906	23259905	Intergenic	CpG	-15364	NR_029533	387225		NR_029533	ENSMUSG00000065405	Mir30a	Mirn30a|mir-30a|mmu-mir-30a	microRNA 30a	ncRNA	-0.146818	0.650848	0.944991
chr14	51940125	51946124	Intergenic	RLTR20A3_MM|LTR|ERVK	-20351	NM_001011687	497071	Mm.378602	NM_001011687	ENSMUSG00000068392	Rnase13	-	ribonuclease, RNase A family, 13 (non-active)	protein-coding	0.259464	0.541439	0.944991
chr15	82356035	82365028	Intergenic	Intergenic	-6240	NM_025987	67130	Mm.27570	NM_025987	ENSMUSG00000022450	Ndufa6	14kDa|2700038D15Rik|B230217P19Rik	NADH:ubiquinone oxidoreductase subunit A6	protein-coding	-0.142866	0.587207	0.944991
chr18	4196101	4202100	Intergenic	Intergenic	33268	NM_026092	67328	Mm.158148	NM_026092	ENSMUSG00000024233	Lyzl1	1700038F02Rik|Lyc2|Lyzd1	lysozyme-like 1	protein-coding	-0.211325	0.57636	0.944991
chr11	55118069	55124068	Intergenic	PB1|SINE|Alu	23083	NM_010299	14667	Mm.287807	NM_010299	ENSMUSG00000000594	Gm2a	AA408702|AW215435|GM2-AP|SAP-3	GM2 ganglioside activator protein	protein-coding	0.127091	0.519482	0.944991
chr8	67512530	67518529	Intergenic	Intergenic	-8325	NM_008674	17962	Mm.57193	NM_008674	ENSMUSG00000056426	Nat3	-	N-acetyltransferase 3	protein-coding	0.156745	0.593366	0.944991
chrX	128545385	128551384	Intergenic	Intergenic	-503140	NR_045441	75274	Mm.108718	NR_045441	ENSMUSG00000086244	4930558G05Rik	-	RIKEN cDNA 4930558G05 gene	ncRNA	0.152002	0.660379	0.944991
chr18	21118934	21124933	Intergenic	Intergenic	49589	NM_008586	17288	Mm.2682	NM_008586	ENSMUSG00000024313	Mep1b	Mep-1b	meprin 1 beta	protein-coding	0.173357	0.681388	0.944991
chr4	134915252	134921251	Intergenic	Intergenic	-3335	NM_027935	71817	Mm.88349	NM_027935	ENSMUSG00000028822	Tmem50a	3200001F09Rik|CAM|Smp1	transmembrane protein 50A	protein-coding	0.146916	0.619712	0.944991
chr13	74528925	74535731	Intergenic	L1_Mur3|LINE|L1	-38378	NM_146231	235956		NM_146231	ENSMUSG00000069208	Zfp825	-	zinc finger protein 825	protein-coding	-0.309518	0.471602	0.944991
chr4	137311678	137317677	Intergenic	Intergenic	37042	NM_009523	22417	Mm.20355	NM_009523	ENSMUSG00000036856	Wnt4	Wnt-4	wingless-type MMTV integration site family, member 4	protein-coding	0.275283	0.491455	0.944991
chr11	95735071	95741643	Intergenic	Intergenic	-10710	NM_201609	268469	Mm.389038	NM_201609	ENSMUSG00000075595	Zfp652	9530033F24Rik|ZNF652	zinc finger protein 652	protein-coding	-0.228516	0.566074	0.944991
chr7	131446657	131453791	Intergenic	Zaphod|DNA|hAT-Tip100	39623	NM_025826	66885	Mm.334274	NM_025826	ENSMUSG00000030861	Acadsb	1300003O09Rik|2-MEBCAD|BB066609|SBCAD	acyl-Coenzyme A dehydrogenase, short/branched chain	protein-coding	0.158589	0.578599	0.944991
chr17	35481051	35487050	Intergenic	Intergenic	13961	NM_010391	15007	Mm.88795	NM_010391	ENSMUSG00000067235	H2-Q10	H-2Q10|H2-K1|Q10|Qa10	histocompatibility 2, Q region locus 10	protein-coding	0.185259	0.437033	0.944991
chr7	72669951	72675950	Intergenic	Intergenic	-366355	NM_001024703	244049	Mm.217412	NM_001024703	ENSMUSG00000032776	Mctp2	Gm489	multiple C2 domains, transmembrane 2	protein-coding	0.196836	0.63341	0.944991
chr11	86867849	86875306	Intergenic	B3|SINE|B2	-18919	NR_162780	114483630		NR_162780		Mir12182	mmu-mir-12182	microRNA mir-12182	ncRNA	0.14461	0.661811	0.944991
chr2	22741997	22747996	Intergenic	LSU-rRNA_Hsa|rRNA|rRNA	-29331	NM_019456	54519	Mm.14255	NM_019456	ENSMUSG00000026786	Apbb1ip	9930118P07Rik|Prp48	amyloid beta (A4) precursor protein-binding, family B, member 1 interacting protein	protein-coding	0.24024	0.422615	0.944991
chr1	136630488	136636487	Intergenic	Intergenic	8586	NM_177643	226442	Mm.62521	NM_177643	ENSMUSG00000041483	Zfp281	Znf281	zinc finger protein 281	protein-coding	-0.109287	0.629285	0.944991
chr1	51737593	51744886	Intergenic	Intergenic	-144521	NR_151621	100045066	Mm.404734	NR_151621		Gm17767	-	predicted gene, 17767	ncRNA	0.264777	0.444524	0.944991
chr1	180754956	180760955	Intergenic	Intergenic	31912	NM_133225	170760	Mm.272981	NM_133225	ENSMUSG00000026499	Acbd3	60kDa|8430407O11Rik|D1Ertd10e|GCP60|GOLPH1|Gocap1|Pap7	acyl-Coenzyme A binding domain containing 3	protein-coding	0.185392	0.669899	0.944991
chr1	23261484	23268654	Intergenic	Intergenic	-7200	NR_029533	387225		NR_029533	ENSMUSG00000065405	Mir30a	Mirn30a|mir-30a|mmu-mir-30a	microRNA 30a	ncRNA	-0.172296	0.354105	0.944991
chr2	157548000	157553999	Intergenic	Intergenic	-9079	NM_001291129	18111	Mm.34330	NM_010923	ENSMUSG00000067786	Nnat	5730414I02Rik|AW107673|Peg5	neuronatin	protein-coding	-0.227549	0.457003	0.944991
chr1	67099164	67107731	Intergenic	Intergenic	-19580	NM_001080809	227231	Mm.343942	NM_001080809	ENSMUSG00000025991	Cps1	4732433M03Rik|CPS|D1Ucla3	carbamoyl-phosphate synthetase 1	protein-coding	-0.162783	0.417514	0.944991
chr12	72625470	72631469	Intergenic	B1_Mus1|SINE|Alu	36359	NM_025522	66375	Mm.289653	NM_025522	ENSMUSG00000021094	Dhrs7	2310016E22Rik|5730564L20Rik|AW061210|Retdsr4|Retsdr4	dehydrogenase/reductase (SDR family) member 7	protein-coding	-0.367342	0.343689	0.944991
chr16	93332149	93338901	Intergenic	L3|LINE|CR1	17664	NR_040486	69857	Mm.81192	NR_040486	ENSMUSG00000100277	1810053B23Rik	1810008L18Rik|1810056K14Rik	RIKEN cDNA 1810053B23 gene	ncRNA	0.186712	0.656504	0.944991
chr3	92426217	92432216	Intergenic	Intergenic	-3366	NM_011477	20765	Mm.57085	NM_011477	ENSMUSG00000054215	Sprr2k	-	small proline-rich protein 2K	protein-coding	0.215461	0.458521	0.944991
chr16	77566883	77572882	Intergenic	Intergenic	-29054	NR_029535	387229		NR_029535	ENSMUSG00000065530	Mir99a	Mirn99a|mir-99a|mmu-mir-99a	microRNA 99a	ncRNA	-0.201306	0.65883	0.944991
chrX	33502636	33508635	Intergenic	Intergenic	71679	NM_001145038	100040732	Mm.465135	NM_001145038	ENSMUSG00000078324	Btbd35f14	Gm2933	BTB domain containing 35, family member 14	protein-coding	0.137658	0.611739	0.944991
chr3	85262075	85276823	Intergenic	Intergenic	-48070	NR_040542	73283	Mm.489084	NR_040542	ENSMUSG00000099995	1700036G14Rik	-	RIKEN cDNA 1700036G14 gene	ncRNA	-0.0970491	0.584212	0.944991
chr8	84198323	84206978	Intergenic	Intergenic	-5868	NR_029740	387216		NR_029740	ENSMUSG00000065611	Mir23a	Mirn23a|mir-23a|mmu-mir-23a	microRNA 23a	ncRNA	0.157611	0.627894	0.944991
chr19	37345961	37351960	Intergenic	B4A|SINE|B4	-18347	NM_031156	15925	Mm.28366	NM_031156	ENSMUSG00000056999	Ide	1300012G03Rik|4833415K22Rik|AA675336|AI507533	insulin degrading enzyme	protein-coding	-0.230284	0.348146	0.944991
chr7	27037034	27043033	Intergenic	Intergenic	10943	NM_133657	13085	Mm.20770	NM_133657	ENSMUSG00000060407	Cyp2a12	-	cytochrome P450, family 2, subfamily a, polypeptide 12	protein-coding	0.207601	0.347967	0.944991
chr12	28895834	28903339	Intergenic	Intergenic	-10643	NR_154989	102633758	Mm.110243	NR_154989		Gm31508	-	predicted gene, 31508	ncRNA	0.233775	0.570739	0.944991
chr7	110644748	110650747	Intergenic	Intergenic	20090	NM_009627	11535	Mm.1408	NM_009627	ENSMUSG00000030790	Adm	AM	adrenomedullin	protein-coding	-0.417854	0.324126	0.944991
chr6	113436235	113442234	Intergenic	Intergenic	-3283	NM_001205025	67767	Mm.2053	NM_026365	ENSMUSG00000051256	Jagn1	5830427H10Rik	jagunal homolog 1	protein-coding	-0.273295	0.470687	0.944991
chr9	123304870	123310869	Intergenic	Intergenic	-47080	NM_001002267	72309	Mm.8569	NM_001002267	ENSMUSG00000054871	Tmem158	2310037P21Rik|Ris1	transmembrane protein 158	protein-coding	0.138406	0.453314	0.944991
chr13	48542525	48549309	Intergenic	CpG	-7645	NR_029725	387244		NR_029725	ENSMUSG00000065421	Mirlet7a-1	Let-7a|Mirnlet7a|Mirnlet7a-1|let-7a-1	microRNA let7a-1	ncRNA	0.124686	0.667992	0.944991
chr7	140909848	140917378	Intergenic	Intergenic	-7289	NM_133946	101613	Mm.386833	NM_133946	ENSMUSG00000038745	Nlrp6	AI504961|Avr|Nalp6|Navr|Navr/Avr|Non-AVR|Pypaf5	NLR family, pyrin domain containing 6	protein-coding	-0.16253	0.438532	0.944991
chr6	67202658	67208657	Intergenic	Intergenic	-61322	NM_001113566	66870	Mm.240490	NM_025814	ENSMUSG00000036371	Serbp1	1200009K13Rik|9330147J08Rik|AL022786|Pairbp1	serpine1 mRNA binding protein 1	protein-coding	0.172751	0.576285	0.944991
chr10	75443264	75449263	Intergenic	HAL1|LINE|L1	-3247	NR_045841	71125	Mm.399516	NR_045841		4933407G14Rik	-	RIKEN cDNA 4933407G14 gene	ncRNA	-0.254878	0.407068	0.944991
chr12	7915953	7922719	Intergenic	Intergenic	-58341	NM_009693	238055	Mm.221239	NM_009693	ENSMUSG00000020609	Apob	AI315052|Apo B-100|apob-100|apob-48	apolipoprotein B	protein-coding	0.149191	0.535328	0.944991
chr14	37024875	37030874	Intergenic	Intergenic	21140	NM_021340	57811	Mm.20460	NM_021340	ENSMUSG00000021804	Rgr	-	retinal G protein coupled receptor	protein-coding	-0.313646	0.363246	0.944991
chr1	131046596	131052595	Intergenic	Intergenic	29750	NM_010548	16153	Mm.874	NM_010548	ENSMUSG00000016529	Il10	CSIF|Il-10	interleukin 10	protein-coding	0.30603	0.456722	0.944991
chr13	52176916	52186648	Intergenic	Intergenic	85041	NR_045061	74050	Mm.84860	NR_045061	ENSMUSG00000113211	4921525O09Rik	-	RIKEN cDNA 4921525O09 gene	ncRNA	0.138891	0.369382	0.944991
chr11	53901178	53912278	Intergenic	B1_Mur4|SINE|Alu	-15025	NM_001362711	20520	Mm.42253	NM_011396	ENSMUSG00000018900	Slc22a5	Lstpl|Octn2|jvs	solute carrier family 22 (organic cation transporter), member 5	protein-coding	-0.180092	0.585532	0.944991
chr9	31968872	31981868	Intergenic	MTC|LTR|ERVL-MaLR	-41255	NM_001370957	330914	Mm.46683	NM_177379	ENSMUSG00000041444	Arhgap32	3426406O18Rik|Gc-gap|Grit|Px-rics|Rics|mKIAA0712|p200Rhogap|p250Gap	Rho GTPase activating protein 32	protein-coding	0.123578	0.689853	0.949797
chr9	95551628	95557627	Intergenic	MIRb|SINE|MIR	-5190	NM_198414	75552	Mm.151485	NM_198414	ENSMUSG00000064225	Paqr9	1700020G04Rik	progestin and adipoQ receptor family member IX	protein-coding	0.156523	0.709799	0.970229
chr10	95677898	95685448	Intergenic	RLTR18B|LTR|ERVK	-117527	NM_027722	71207	Mm.24397	NM_027722	ENSMUSG00000020029	Nudt4	4933436C10Rik|DIPP-2|DIPP2|DIPP2alpha|DIPP2beta|HDCMB47P	nudix (nucleoside diphosphate linked moiety X)-type motif 4	protein-coding	0.0789348	0.720218	0.977439
chr6	128641939	128647938	Intergenic	Intergenic	-17447	NM_053165	94071	Mm.197689	NM_053165	ENSMUSG00000030364	Clec2h	Clrf|clr-f	C-type lectin domain family 2, member h	protein-coding	0.119186	0.733503	0.981448
chr7	14516211	14529520	Intergenic	MERV1_I-int|LTR|ERV1	-29842	NM_001184981	638251	Mm.482063	NM_001184981	ENSMUSG00000094156	Sult2a7	EG638251|Gm7231	sulfotransferase family 2A, dehydroepiandrosterone (DHEA)-preferring, member 7	protein-coding	-0.0512438	0.731899	0.981448
chr11	41495735	41501734	Intergenic	Intergenic	502123	NM_008073	14406	Mm.5309	NM_008073	ENSMUSG00000020436	Gabrg2	GABAA-R|Gabrg-2|gamma2	gamma-aminobutyric acid (GABA) A receptor, subunit gamma 2	protein-coding	0.0726314	0.748318	0.981651
chr7	48914221	48920814	Intergenic	Intergenic	-35921	NM_001360812	108961	Mm.240566	NM_001013368	ENSMUSG00000046179	E2f8	4432406C08Rik|AA410048	E2F transcription factor 8	protein-coding	-0.12935	0.744334	0.981651
chr12	7946985	7953427	Intergenic	Intergenic	-27471	NM_009693	238055	Mm.221239	NM_009693	ENSMUSG00000020609	Apob	AI315052|Apo B-100|apob-100|apob-48	apolipoprotein B	protein-coding	-0.0819319	0.753443	0.981651
chr3	39355908	39361907	Intergenic	Intergenic	471967	NM_183221	329628	Mm.316210	NM_183221	ENSMUSG00000046743	Fat4	6030410K14Rik|9430004M15	FAT atypical cadherin 4	protein-coding	-0.130407	0.759174	0.981651
chr5	67295778	67301777	Intergenic	Intergenic	-8178	NM_001310629	109108	Mm.234455	NM_178651	ENSMUSG00000029221	Slc30a9	2310024J23Rik|AL024256|GAC63|HUEL|znT-9	solute carrier family 30 (zinc transporter), member 9	protein-coding	-0.133159	0.759488	0.981651
chr3	124382678	124388677	Intergenic	Intergenic	40362	NM_027939	71824	Mm.331353	NM_027939	ENSMUSG00000027973	1700006A11Rik	-	RIKEN cDNA 1700006A11 gene	protein-coding	0.0405757	0.913648	0.989143
chr2	147931621	147937620	Intergenic	Intergenic	110844	NM_001291067	15376	Mm.938	NM_010446	ENSMUSG00000037025	Foxa2	HNF3-beta|HNF3beta|Hnf-3b|Hnf3b|Tcf-3b|Tcf3b	forkhead box A2	protein-coding	0.0124992	0.977165	0.989143
chr17	36228463	36234462	Intergenic	CpG	26384	NM_026308	67676	Mm.27131	NM_026308	ENSMUSG00000024446	Rpp21	0610037N01Rik	ribonuclease P 21 subunit	protein-coding	0.0173615	0.943719	0.989143
chr7	15286123	15292122	Intergenic	Intergenic	-99729	NM_145708	246792	Mm.26391	NM_145708	ENSMUSG00000074369	Obox2	-	oocyte specific homeobox 2	protein-coding	-0.0950009	0.804594	0.989143
chr1	161724476	161730475	Intergenic	CpG	61020	NM_010177	14103	Mm.3355	NM_010177	ENSMUSG00000000817	Fasl	APT1LG1|CD178|CD95-L|CD95L|Fas-L|Faslg|Tnfsf6|Tnlg1a|gld	Fas ligand (TNF superfamily, member 6)	protein-coding	0.0411125	0.921192	0.989143
chr19	12658151	12664150	Intergenic	RLTR1B-int|LTR|ERV1	-13029	NM_146697	258692	Mm.223127	NM_146697	ENSMUSG00000044441	Olfr1442	MOR202-9	olfactory receptor 1442	protein-coding	-0.0299492	0.943533	0.989143
chr15	90879614	90885613	Intergenic	Intergenic	15863	NR_033583	20738	Mm.431547	NR_033583	ENSMUSG00000116210	Spn-ps	Cd43-ps	sialophorin, pseudogene	pseudo	-0.0918187	0.807828	0.989143
chr11	106390382	106396381	Intergenic	Intergenic	-10600	NM_010494	15896	Mm.394	NM_010494	ENSMUSG00000001029	Icam2	CD102|Icam-2|Ly-60	intercellular adhesion molecule 2	protein-coding	-0.0430758	0.853583	0.989143
chr2	170282073	170290582	Intergenic	PB1D9|SINE|Alu	-70034	NR_040610	73303	Mm.443297	NR_040610	ENSMUSG00000086999	Bcas1os2	1700040N02Rik	breast carcinoma amplified sequence 1, opposite strand 2	ncRNA	-0.0426975	0.912651	0.989143
chr18	46641899	46654103	Intergenic	Intergenic	50297	NM_010120	13664	Mm.262037	NM_010120	ENSMUSG00000057561	Eif1a	C76390|Ef1a|Eftu|Eif4c|eIF-1A|eIF-4C	eukaryotic translation initiation factor 1A	protein-coding	-0.0379316	0.814474	0.989143
chr15	68359405	68366810	Intergenic	Intergenic	-21818	NR_029718	387228		NR_029718	ENSMUSG00000065437	Mir30d	Mirn30d|mir-30d|mmu-mir-30d	microRNA 30d	ncRNA	-0.0225012	0.941535	0.989143
chr16	4825604	4832637	Intergenic	Intergenic	-6296	NM_030192	78809	Mm.325551	NM_030192	ENSMUSG00000022518	4930562C15Rik	-	RIKEN cDNA 4930562C15 gene	protein-coding	0.0664825	0.819025	0.989143
chr3	98731080	98737704	Intergenic	ERVB5_1-I_MM-int|LTR|ERVK	-9849	NM_001359741	15493	Mm.482364	NM_153193	ENSMUSG00000063730	Hsd3b2	3-beta-HSD II	hydroxy-delta-5-steroid dehydrogenase, 3 beta- and steroid delta-isomerase 2	protein-coding	0.0577662	0.874939	0.989143
chr18	64322382	64328777	Intergenic	Intergenic	-14785	NM_194268	225631	Mm.234723	NM_194268	ENSMUSG00000045991	Onecut2	C730009D12|OC-2|Oc2	one cut domain, family member 2	protein-coding	0.0797381	0.843758	0.989143
chr4	129896068	129902067	Intergenic	Intergenic	-7159	NR_045190	319894	Mm.59196	NR_045190	ENSMUSG00000086369	E330017L17Rik	-	RIKEN cDNA E330017L17 gene	ncRNA	0.0326338	0.925897	0.989143
chr19	4817709	4823708	Intergenic	Intergenic	-9074	NM_001290128	102902673	Mm.426069	NM_001290127	ENSMUSG00000096370	Gm21992	Rbm14-rbm4	predicted gene 21992	protein-coding	0.1228	0.780304	0.989143
chr14	48076705	48082704	Intergenic	Intergenic	-41165	NM_033602	93834	Mm.296457	NM_033602	ENSMUSG00000021846	Peli2	AW047589|BB129927	pellino 2	protein-coding	-0.0454878	0.915056	0.989143
chr9	65618601	65625361	Intergenic	Intergenic	-8601	NM_028030	71973	Mm.29148	NM_028030	ENSMUSG00000032387	Rbpms2	2400008B06Rik|AI316523	RNA binding protein with multiple splicing 2	protein-coding	0.0568573	0.858359	0.989143
chr12	71443161	71450091	Intergenic	Intergenic	-62418	NR_136902	67348	Mm.54261	NR_136902	ENSMUSG00000100668	1700083H02Rik	100041190|Gm3190	RIKEN cDNA 1700083H02 gene	ncRNA	0.0939578	0.807231	0.989143
chr4	149972530	149978529	Intergenic	ORR1F|LTR|ERVL-MaLR	-20523	NM_029035	74646	Mm.30	NM_029035	ENSMUSG00000039911	Spsb1	1110014L01Rik|4930422J18Rik|AI596360|AI854583|SSB-1|SSB1	splA/ryanodine receptor domain and SOCS box containing 1	protein-coding	0.0101744	0.96794	0.989143
chr11	79735265	79741933	Intergenic	Intergenic	12199	NR_029959	723853		NR_029959	ENSMUSG00000065489	Mir365-2	Mirn365-2|mir-365-2	microRNA 365-2	ncRNA	0.0457542	0.891343	0.989143
chr11	100359000	100364999	Intergenic	Intergenic	-5858	NM_010404	15114	Mm.281700	NM_010404	ENSMUSG00000006930	Hap1	HAP-1	huntingtin-associated protein 1	protein-coding	0.0583627	0.853555	0.989143
chr12	19117091	19123090	Intergenic	MMVL30-int|LTR|ERV1	605580	NM_001201330	236366	Mm.352227	NM_001033157	ENSMUSG00000073197	5730507C01Rik	-	RIKEN cDNA 5730507C01 gene	protein-coding	-0.0101792	0.970582	0.989143
chrX	103162305	103168304	Intergenic	(CCG)n|Simple_repeat|Simple_repeat	21360	NM_008671	17954	Mm.388694	NM_008671	ENSMUSG00000082229	Nap1l2	Bpx	nucleosome assembly protein 1-like 2	protein-coding	0.01692	0.950414	0.989143
chr1	64991404	64997403	Intergenic	Intergenic	-37579	NM_001039493	241075	Mm.239534	NM_175509	ENSMUSG00000051344	Plekhm3	9430067K14Rik|A230102O09Rik|AI449570|DAPR|Plekhm1l	pleckstrin homology domain containing, family M, member 3	protein-coding	-0.0392728	0.91643	0.989143
chr18	35811543	35819281	Intergenic	Intergenic	-14376	NM_133687	67393	Mm.94560	NM_133687	ENSMUSG00000046668	Cxxc5	4930415K17Rik	CXXC finger 5	protein-coding	0.0502169	0.886587	0.989143
chr2	131251041	131257040	Intergenic	Intergenic	-7968	NM_001355681	74450	Mm.101264	NM_153501	ENSMUSG00000037514	Pank2	4933409I19Rik|AI642621	pantothenate kinase 2	protein-coding	-0.00489004	0.989143	0.989143
chr6	117294930	117301419	Intergenic	Intergenic	129639	NM_001012477	20315	Mm.303231	NM_013655	ENSMUSG00000061353	Cxcl12	Pbsf|Scyb12|Sdf1|Tlsf|Tpar1	chemokine (C-X-C motif) ligand 12	protein-coding	0.00789429	0.984813	0.989143
chr7	119664017	119671412	Intergenic	Intergenic	-22312	NM_178414	233801	Mm.240412	NM_178414	ENSMUSG00000047026	Acsm4	O-MACS|OMACS	acyl-CoA synthetase medium-chain family member 4	protein-coding	0.0138255	0.956187	0.989143
chr9	65608972	65614971	Intergenic	Intergenic	-18611	NM_028030	71973	Mm.29148	NM_028030	ENSMUSG00000032387	Rbpms2	2400008B06Rik|AI316523	RNA binding protein with multiple splicing 2	protein-coding	0.104103	0.817365	0.989143
chr8	94374310	94381933	Intergenic	Intergenic	-8308	NM_022331	64209	Mm.29151	NM_022331	ENSMUSG00000031770	Herpud1	Herp|Mifl|SUP	homocysteine-inducible, endoplasmic reticulum stress-inducible, ubiquitin-like domain member 1	protein-coding	-0.00703132	0.977125	0.989143
chr5	116630352	116636351	Intergenic	Intergenic	-41534	NM_026886	68955	Mm.146779	NM_026886	ENSMUSG00000063919	Srrm4	1500001A10Rik|B230202K19Rik|bv|mKIAA1853|nSR100	serine/arginine repetitive matrix 4	protein-coding	-0.00688083	0.986449	0.989143
chr1	4766466	4772465	Intergenic	Intergenic	16261	NM_001177658	27395	Mm.182927	NM_025300	ENSMUSG00000033845	Mrpl15	HSPC145|MRP-L7|Rpml7	mitochondrial ribosomal protein L15	protein-coding	-0.0894331	0.826699	0.989143
chr16	4798028	4804027	Intergenic	MER31B|LTR|ERV1	-10735	NM_001358082	66626	Mm.157648	NM_025670	ENSMUSG00000004071	Cdip1	2700048O17Rik|5730403B10Rik|AU018521|AW742692|CDIP	cell death inducing Trp53 target 1	protein-coding	0.0746653	0.771374	0.989143
chr4	101339426	101345929	Intergenic	Intergenic	4350	NR_029537	387143		NR_029537	ENSMUSG00000065451	Mir101a	Mirn101|Mirn101a|miR-101|mir-101a	microRNA 101a	ncRNA	0.0705547	0.81117	0.989143
chr14	113311733	113317732	Intergenic	Intergenic	-1517233	NR_045661	75822	Mm.410813	NR_045661	ENSMUSG00000115320	4930524C18Rik	-	RIKEN cDNA 4930524C18 gene	ncRNA	0.0199855	0.956449	0.989143
chr3	95665444	95672464	Intergenic	Intergenic	10233	NM_008562	17210	Mm.1639	NM_008562	ENSMUSG00000038612	Mcl1	AW556805|Mcl-1	myeloid cell leukemia sequence 1	protein-coding	0.0253742	0.949816	0.989143
chr9	78350660	78358382	Intergenic	MT2B|LTR|ERVL	-7376	NM_008182	14858	Mm.422778	NM_008182	ENSMUSG00000057933	Gsta2	Gst2-2|Gstc-2|Gstc2	glutathione S-transferase, alpha 2 (Yc2)	protein-coding	0.0394012	0.909493	0.989143
chr4	150681587	150690538	Intergenic	Intergenic	-33888	NM_001355737	242773	Mm.29280	NM_173774	ENSMUSG00000039838	Slc45a1	C230078B22|Dnb5	solute carrier family 45, member 1	protein-coding	0.0384691	0.926395	0.989143
chr10	45872441	45878440	Intergenic	Intergenic	67736	NR_040624	320363	Mm.123343	NR_040624	ENSMUSG00000110874	D030045P18Rik	-	RIKEN cDNA D030045P18 gene	ncRNA	0.0688674	0.787984	0.989143
chr1	7174807	7181597	Intergenic	Intergenic	89282	NM_183028	319263	Mm.21539	NM_183028	ENSMUSG00000051285	Pcmtd1	8430411F12Rik|A030012M09Rik	protein-L-isoaspartate (D-aspartate) O-methyltransferase domain containing 1	protein-coding	-0.0144661	0.971574	0.989143
chr5	31559838	31565837	Intergenic	Intergenic	8560	NR_102275	100740	Mm.23370	NR_102275		AI839979	-	expressed sequence AI839979	ncRNA	0.0428914	0.915644	0.989143
chr12	119260700	119266699	Intergenic	Intergenic	-25423	NM_177290	320910	Mm.217000	NM_177290	ENSMUSG00000025321	Itgb8	4832412O06Rik	integrin beta 8	protein-coding	0.0160623	0.945587	0.989143
