# Supplementary material for: Hammerhead-type FXR agonists induce an enhancer RNA Fincor that ameliorates nonalcoholic steatohepatitis in mice
Source: eLife. 2024 Apr 15;13:RP91438. doi: 10.7554/eLife.91438 (PMC11018349; doi:10.7554/eLife.91438)
Supplement: Supplementary file 2. [file elife-91438-supp2.xlsx]

## Sheet: lko.rna.2v2.DESeq2.Up_ko_vs_wt 
ID	chr	start	end	strand	Length	Copies	Annotation/Divergence	CTL2-homer (16936241.0 total)	CLT3-homer (16259381.0 total)	LKO1-homer (14932448.0 total)	LKO3-homer (14393004.0 total)	wt vs. ko Log2 Fold Change	wt vs. ko p-value	wt vs. ko adj. p-value
NM_001312908	chr5	121860216	122049851	-	189635	1	Cux2|1700051K22Rik|Cutl2|Cux-2|-|5 F|5 62.02 cM|protein-coding	190.23	187.82	576.57	662.9	1.67737	7.91011e-16	6.59149e-12
NM_001122756	chr5	72300025	72504540	-	204515	1	Corin|AV273130|Lrp4|-|5|5 C3.2|protein-coding	116.36	160.85	365.2	280.54	1.17823	1.57881e-05	0.00730901
NM_001081416	chr17	7738569	7827302	-	88733	1	Fndc1|1110027O12Rik|1110051A18Rik|mKIAA1866|-|17|17 A1|protein-coding	33.24	26.97	131.85	82.32	1.78478	8.65697e-05	0.026718
NM_001305663	chr10	28668360	28883818	+	215458	1	Themis|E430004N04Rik|Gasp|Spot|Tsepa|thylex|-|10|10 A4|protein-coding	637.18	523.96	1070.48	862.2	0.693508	9.27786e-05	0.0271271
NM_001359214	chr5	114026913	114091380	-	64467	1	Svop|1110030H18Rik|AI415691|msvop|-|5|5 F|protein-coding	36.94	41.42	115.11	121.31	1.55639	9.04951e-05	0.026932
NM_001098528	chr1	15286925	15723750	+	436825	1	Kcnb2|9630047L19Rik|BB130875|Kv2.2|-|1 A3|1 4.5 cM|protein-coding	262.26	113.65	524.25	531.83	1.45273	5.10508e-06	0.00303862
NM_001346701	chr12	84052144	84060400	+	8256	1	Acot3|AW108394|PTE-Ia|Pte2a|-|12|12 D1|protein-coding	159.76	290.88	706.33	591.41	1.48507	2.80913e-08	4.25609e-05
NR_151606	chr4	38571667	38855483	-	283816	1	Gm12381|-|-|4 A5|4 19.97 cM|ncRNA	1679.77	1426.45	4111.35	2974.37	1.14617	1.1861e-12	3.95351e-09
NM_176998	chr15	44671856	44788063	-	116207	1	Sybu|Golsyn|-|15|15 B3.2|protein-coding	603.94	775.35	1182.44	1136.24	0.710735	3.25144e-05	0.0123156
NR_038029	chr3	117060522	117077765	-	17243	1	1700061I17Rik|-|-|3|3 G1|ncRNA	55.41	43.34	141.27	129.98	1.41783	0.000133484	0.0347599
NM_020275	chr14	69767472	69784411	+	16939	1	Tnfrsf10b|DR5|KILLER|Ly98|MK|TRAILR2|TRICK2A|TRICK2B|TRICKB|-|14|14 D2|protein-coding	132.05	134.84	274.16	284.87	1.02924	4.90414e-05	0.0177679
NM_001358361	chrX	41400854	41678601	+	277747	1	Gria3|2900064I19Rik|GluA3|GluR-C|GluR-K3|Glur-3|Glur3|Gluralpha3|-|X A4|X 23.19 cM|protein-coding	2947.67	3439.47	5111.72	6196.78	0.789671	1.66248e-07	0.000162982
NM_001313889	chr3	7572028	7613760	-	41732	1	Il7|A630026I06Rik|Il-7|hlb368|-|3 A1|3 2.02 cM|protein-coding	116.36	112.69	196.73	373.69	1.28893	0.000171165	0.0425768
NM_173427	chr4	139962173	139968026	-	5853	1	Klhdc7a|B230308G19Rik|-|4|4 D3|protein-coding	659.35	529.74	1001.42	919.61	0.652652	0.000137651	0.0352937
NM_001004140	chr8	22168152	22185819	-	17667	1	Ckap2|AI461656|AW228814|LB1|-|8|8 A2|protein-coding	155.14	191.67	354.73	331.45	0.945695	7.83668e-05	0.025535
NM_008651	chr1	9667411	9700209	-	32798	1	Mybl1|A-myb|G1-419-6|repro9|-|1 A2|1 2.08 cM|protein-coding	436.79	378.52	881.08	696.47	0.910382	9.67945e-07	0.000701382
NM_175540	chrX	97333841	97377209	-	43368	1	Eda2r|9430060M22Rik|TNFRSF27|Xedar|-|X|X C3|protein-coding	625.18	520.11	990.95	1114.57	0.842523	1.48691e-06	0.000991236
NM_011169	chr15	10177238	10337020	+	159782	1	Prlr|AI987712|Pr-1|Pr-3|Prlr-rs1|-|15 A1|15 5.23 cM|protein-coding	2406.53	2216.25	6711.68	6753.52	1.50473	1.77271e-38	2.9544e-34

## Sheet: lko.rna.2v2.DESeq2.Down_ko_vs_w
ID	chr	start	end	strand	Length	Copies	Annotation/Divergence	CTL2-homer (16936241.0 total)	CLT3-homer (16259381.0 total)	LKO1-homer (14932448.0 total)	LKO3-homer (14393004.0 total)	wt vs. ko Log2 Fold Change	wt vs. ko p-value	wt vs. ko adj. p-value
NM_027671	chr1	8359739	9299877	-	940138	1	Sntg1|4933426D16Rik|G1SYN|SYN4|-|1|1 A1-A2|protein-coding	3728.91	4193.63	2687.18	2038.51	-0.788365	6.67554e-08	7.94675e-05
NM_001159638	chr2	105224342	105379860	+	155518	1	Them7|0610012H03Rik|-|2|2 E3|protein-coding	3730.76	4028.93	2888.09	2861.72	-0.470639	7.00941e-05	0.0238406
NM_177828	chr18	61493794	61536536	-	42742	1	Arhgef37|4933429F08Rik|-|18|18 E1|protein-coding	1576.34	1335.91	711.56	932.6	-0.85806	3.26201e-06	0.0020135
NR_132764	chr5	51454249	51567725	-	113476	1	Ppargc1a|A830037N07Rik|Gm11133|PGC-1|PPARGC-1-alpha|Pgc-1alpha|Pgc1|Pgco1|Ppargc1|-|5|5 C1|protein-coding	2967.99	3469.33	2031.08	2099.17	-0.677762	5.54002e-07	0.000439666
NM_001271547	chr18	36528152	36556272	+	28120	1	Slc4a9|AE4|D630003B07|D630024F24Rik|-|18|18 B2|protein-coding	139.44	94.39	26.16	23.83	-2.26483	5.83006e-07	0.000441654
NM_008036	chr7	19302696	19310045	-	7349	1	Fosb|-|-|7 A3|7 9.56 cM|protein-coding	123.74	145.44	42.9	20.58	-2.12891	1.22158e-06	0.000848284
NM_019445	chr1	174501825	174822729	+	320904	1	Fmn2|AU024104|-|1 H3|1 81.04 cM|protein-coding	777.55	781.13	502.28	472.26	-0.716474	1.17736e-05	0.00594603
NM_031192	chr1	133350674	133360319	+	9645	1	Ren1|D19352|Ren|Ren-1|Ren-A|Ren1c|Ren1d|Rn-1|Rnr|-|1 E4|1 57.91 cM|protein-coding	1802.59	1771.26	1322.66	1052.83	-0.630905	1.25997e-05	0.00617607
NM_008341	chr11	7197787	7202546	+	4759	1	Igfbp1|-|-|11 A1|11 4.75 cM|protein-coding	1279.91	1614.27	880.03	793.96	-0.829706	4.16638e-07	0.000365457
NM_153778	chr6	72206177	72235577	-	29400	1	Atoh8|4933425C05Rik|Hath6|Math6|bHLHa21|okadin|-|6|6 C1|protein-coding	779.4	802.32	573.43	478.76	-0.628766	0.00017997	0.0441085
NM_001291050	chr2	132529082	132578248	-	49166	1	Gpcpd1|2310004G06Rik|2310032D16Rik|AU015213|Gde5|Prei4|mKIAA1434|-|2 F2|2|protein-coding	5021.75	5721.21	3536.87	3616.68	-0.624326	5.16149e-07	0.000430107
NM_001081212	chr8	10984681	11008929	-	24248	1	Irs2|Irs-2|-|8 A1.1|8 5.35 cM|protein-coding	952.08	893.82	602.73	495.01	-0.790678	1.75917e-06	0.00112763
NM_206537	chr19	40037940	40073813	-	35873	1	Cyp2c54|EG404195|-|19|19 C3|protein-coding	1979.89	1657.61	1148.96	1248.89	-0.637583	2.75612e-05	0.0106822
NM_009867	chr2	179442431	179899375	+	456944	1	Cdh4|AW120700|R-CAD|R-Cadh|Rcad|-|2 H4|2 101.86 cM|protein-coding	1918.02	1815.57	1216.98	1324.71	-0.591304	2.11283e-05	0.0085884
NM_001114332	chr10	40033535	40142254	-	108719	1	Slc16a10|2610103N14Rik|9830169E08|Mct10|PRO0813|TAT1|-|10|10 B1|protein-coding	7449.52	7473.22	4651.3	5210.01	-0.633467	2.90798e-07	0.000269246
NM_033523	chr11	19924442	20022597	+	98155	1	Spred2|C79158|-|11|11 A3.1|protein-coding	2075.93	2206.62	1495.32	1509.93	-0.548832	2.1065e-05	0.0085884
NM_011366	chr14	70180468	70207671	-	27203	1	Sorbs3|SCAM-1|SH3P3|Sh3d4|vinexin-g|-|14 D2|14 36.27 cM|protein-coding	2431.46	2199.87	1634.49	1598.75	-0.556663	1.46536e-05	0.00697763
NM_020296	chr2	60751953	60963204	-	211251	1	Rbms1|2600014B10Rik|AI255215|MSSP-1|MSSP-2|MSSP-3|YC1|-|2|2 C1.2|protein-coding	6976.71	6329.94	5429.83	4622.94	-0.445189	0.00020287	0.0479243
NM_001164491	chr18	61799393	61911852	-	112459	1	Ablim3|AW990719|D930036B08Rik|-|18|18 E1|protein-coding	2368.66	2185.43	1449.28	1444.94	-0.691924	7.53215e-08	8.36873e-05
NM_001364996	chr18	61291445	61400412	-	108967	1	Ppargc1b|4631412G21Rik|PGC-1beta|PGC-1beta/ERRL1|PPARGC-1-beta|Perc|-|18|18 E1|protein-coding	3634.72	3427.91	2697.65	2454.45	-0.494515	2.42672e-05	0.00962946
NM_170729	chr10	69533708	70027436	+	493728	1	Ank3|2900054D09Rik|AI314020|Ank-3|AnkG|Ankyrin-3|Ankyrin-G|-|10 B5.3|10 36.1 cM|protein-coding	5514.88	5069.15	4276.68	3346.97	-0.515493	0.000111926	0.0307951
NR_155456	chr4	42670290	42871806	+	201516	1	4930578G10Rik|1700031K17Rik|-|4|4 A5|ncRNA	143.14	138.7	63.83	41.16	-1.46735	8.97652e-05	0.026932
NM_029609	chr7	132610643	132706419	+	95776	1	Lhpp|2310007H09Rik|-|7|7 F3|protein-coding	3134.21	2764.29	1966.21	1772.05	-0.697521	5.91907e-08	7.58825e-05
NM_172571	chr11	116142285	116168178	-	25893	1	Fbf1|1110033G01Rik|5930413D20|mKIAA1863|-|11|11 E2|protein-coding	2024.21	2881.8	1200.23	1046.34	-1.16758	5.90622e-11	1.40619e-07
NM_001303271	chr5	137650481	137684753	-	34272	1	Agfg2|A630095P14Rik|Hrbl|RAB-R|RABR|-|5|5 G2|protein-coding	1361.17	1211.66	853.87	853.53	-0.629494	2.00947e-05	0.00858715
NM_010726	chr2	4918996	4938743	+	19747	1	Phyh|AI256161|AI265699|Lnap1|PAHX|-|2|2 A1|protein-coding	4709.62	4547.11	3379.91	3553.86	-0.45382	0.000117889	0.0315479
NR_045954	chr7	67784538	67803496	-	18958	1	4833412C05Rik|Bigheart|-|7|7 C|ncRNA	119.13	115.58	50.23	31.41	-1.56641	0.000141055	0.0356186
NR_040705	chr8	10870422	10882454	-	12032	1	B930025P03Rik|-|-|8|8 A1.1|ncRNA	343.53	290.88	86.85	70.41	-2.05245	1.19966e-13	6.66448e-10
NM_001198587	chr12	88794504	90334933	+	1540429	1	Nrxn3|-|-|12 D3|12 42.94 cM|protein-coding	2832.24	2669.9	1839.59	1971.36	-0.566532	1.15592e-05	0.00594603
NM_029628	chr13	35967906	35970388	+	2482	1	Ppp1r3g|1600032L17Rik|-|13|13 A3.3|protein-coding	241.02	279.32	133.94	44.41	-1.59761	8.12047e-05	0.025535
NM_019483	chr3	54755582	54801269	+	45687	1	Smad9|MADH6|Madh8|Madh9|Smad8|-|3|3 C|protein-coding	817.26	1044.07	536.81	544.83	-0.82107	6.35391e-06	0.00365153
NM_001033041	chr1	127729413	127767564	+	38151	1	Acmsd|-|-|1|1 E3|protein-coding	2485.94	2510.98	1363.47	1858.71	-0.665479	0.000119256	0.0315479
NR_045298	chr1	127753617	127774054	-	20437	1	2900009J06Rik|-|-|1|1 E3|ncRNA	1030.58	1121.13	614.24	748.47	-0.693938	6.90999e-05	0.0238406
NM_011834	chr8	60506124	60545677	+	39553	1	Aadat|AI875679|Aadt|KATII|Kat2|Kyat2|mKat-2|-|8 B3.1|8 30.85 cM|protein-coding	1642.83	1914.78	1089.31	1268.38	-0.629073	7.77591e-05	0.025535
NM_138654	chr13	16857475	17694765	-	837290	1	Sugct|5033411D12Rik|D17907|-|13|13 A2|protein-coding	10763.8	10348.3	8127.47	8168.13	-0.411285	0.000112715	0.0307951
NM_008166	chr14	34820136	35581115	+	760979	1	Grid1|GluD1|GluRdelta1|-|14 B|14 20.84 cM|protein-coding	744.31	547.08	257.42	241.55	-1.41068	6.80018e-11	1.41665e-07
NM_201256	chr18	36664060	36666324	+	2264	1	Eif4ebp3|4e-bp3|-|18|18 B2|protein-coding	447.88	493.14	232.3	275.12	-0.926876	1.74728e-05	0.00786553
NM_001034851	chr15	25843298	25973696	+	130398	1	Retreg1|1810015C04Rik|AU015349|Fam134b|Retreg1d|-|15|15 B1|protein-coding	2822.08	3287.29	2305.24	2097	-0.51251	0.000105172	0.0297085
NM_001244936	chr5	134357661	134456716	-	99055	1	Gtf2ird1|1700012P16Rik|BEN|Cream1|ESTM9|GTF3|Gtf2il|MusTRD1|Tg(Alb1-Myc)166.8Sst|WBSCR11|X83320|-|5 G2|5 74.55 cM|protein-coding	2702.95	2895.28	2033.18	1900.95	-0.548059	7.12337e-06	0.00395727
NM_001305935	chr9	83925137	84124240	+	199103	1	Bckdhb|BCKDE1B|BCKDH E1-beta|-|9|9 E2|protein-coding	8111.63	8651.17	6478.33	6480.56	-0.40927	0.000204166	0.0479243
NM_001114339	chr19	34806936	34879455	-	72519	1	Pank1|Pank|Pank1b|-|19 C1|19|protein-coding	4827.83	4954.53	3762.89	3760.74	-0.416685	0.000198063	0.0478393
NM_178793	chr18	66056856	66291838	-	234982	1	Ccbe1|4933426F18Rik|9430093N24Rik|mKIAA1983|-|18|18 E1|protein-coding	2085.16	1806.9	1478.58	1174.15	-0.594704	8.09463e-05	0.025535
NM_001085373	chr18	44425060	44812182	-	387122	1	Mcc|D18Ertd451e|E330037C19|-|18 B3|18 23.74 cM|protein-coding	3827.72	3315.22	2751.01	2368.88	-0.520736	6.90297e-05	0.0238406
NM_031193	chr1	133350566	133360323	+	9757	1	Ren2|Ren|Ren-2|Ren-B|Rn-2|Rnr|-|1 E4|1|protein-coding	1814.59	1779.93	1341.5	1063.67	-0.62139	1.79341e-05	0.00786553
NM_172290	chr9	28994749	29963269	-	968520	1	Ntm|6230410L23Rik|B230210G24Rik|Hnt|Igdcc2|R75390|-|9|9 A4|protein-coding	2178.43	2163.27	1388.59	1400.53	-0.67628	1.00049e-07	0.000104213
NM_146146	chr4	101717906	101815352	+	97446	1	Lepr|LEPROT|Leprb|Modb1|OB-RGRP|Obr|db|diabetes|obese-like|obl|-|4 C6|4 46.96 cM|protein-coding	1222.66	1352.29	774.34	513.42	-1.04432	4.33177e-08	6.01611e-05
NM_011825	chr1	174833785	174921819	-	88034	1	Grem2|Gremlin2|Prdc|-|1|1 H3|protein-coding	1596.65	1229	928.17	880.61	-0.682138	3.92197e-05	0.0145252
NM_008342	chr1	72824480	72852471	+	27991	1	Igfbp2|AI255832|IBP-2|Igfbp-2|mIGFBP-2|-|1 C3|1 36.94 cM|protein-coding	5739.28	4499.92	2698.69	2243.23	-1.09176	1.82272e-13	7.59434e-10
NM_001291150	chr2	161521988	162661147	-	1139159	1	Ptprt|R-PTP-T|RPTP-rfo|RPTP-rho|RPTPmam4|RPTPrho|mKIAA0283|mRPTPrho|-|2 H2|2 81.91 cM|protein-coding	433.1	278.36	191.49	154.89	-1.07921	9.74509e-05	0.028002
NM_001099331	chr2	163492318	163502612	+	10294	1	R3hdml|-|-|2|2 H3|protein-coding	378.62	469.06	126.62	177.64	-1.51217	9.58217e-09	1.59696e-05
NM_207655	chr11	16752203	16913907	+	161704	1	Egfr|9030024J15Rik|AI552599|Erbb|Errb1|Errp|Wa5|wa-2|wa2|-|11 A2|11 9.41 cM|protein-coding	13531.4	12605.9	8442.44	7839.93	-0.721899	1.0433e-11	2.89794e-08
NM_001360339	chr14	8296270	8317607	-	21337	1	Fam107a|DRR1|-|14|14 A1|protein-coding	589.16	977.61	196.73	293.54	-1.70865	8.06486e-10	1.49343e-06
NM_010001	chr19	39992424	40012243	+	19819	1	Cyp2c37|-|-|19|19 C3|protein-coding	2348.35	2102.59	1622.98	1398.36	-0.599223	8.93937e-06	0.00480592
