# Supplementary figures and images for: Hammerhead-type FXR agonists induce an enhancer RNA Fincor that ameliorates nonalcoholic steatohepatitis in mice
Source: eLife journal article supplement (doi:10.7554/elife.91438), 2024-01-18

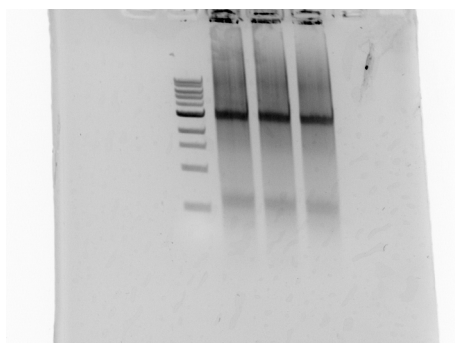

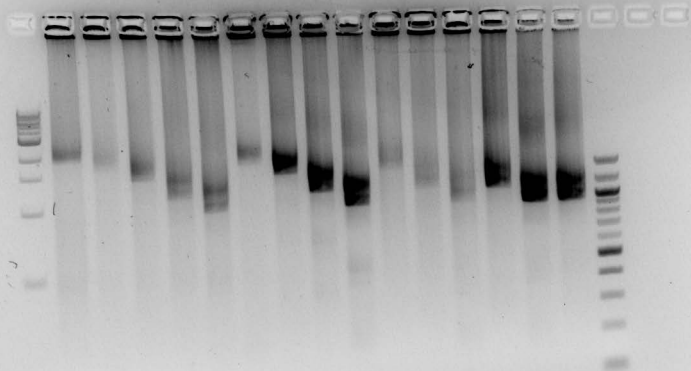

Supplement: fig3-data1 [file elife-91438-fig3-data1-v1.zip]

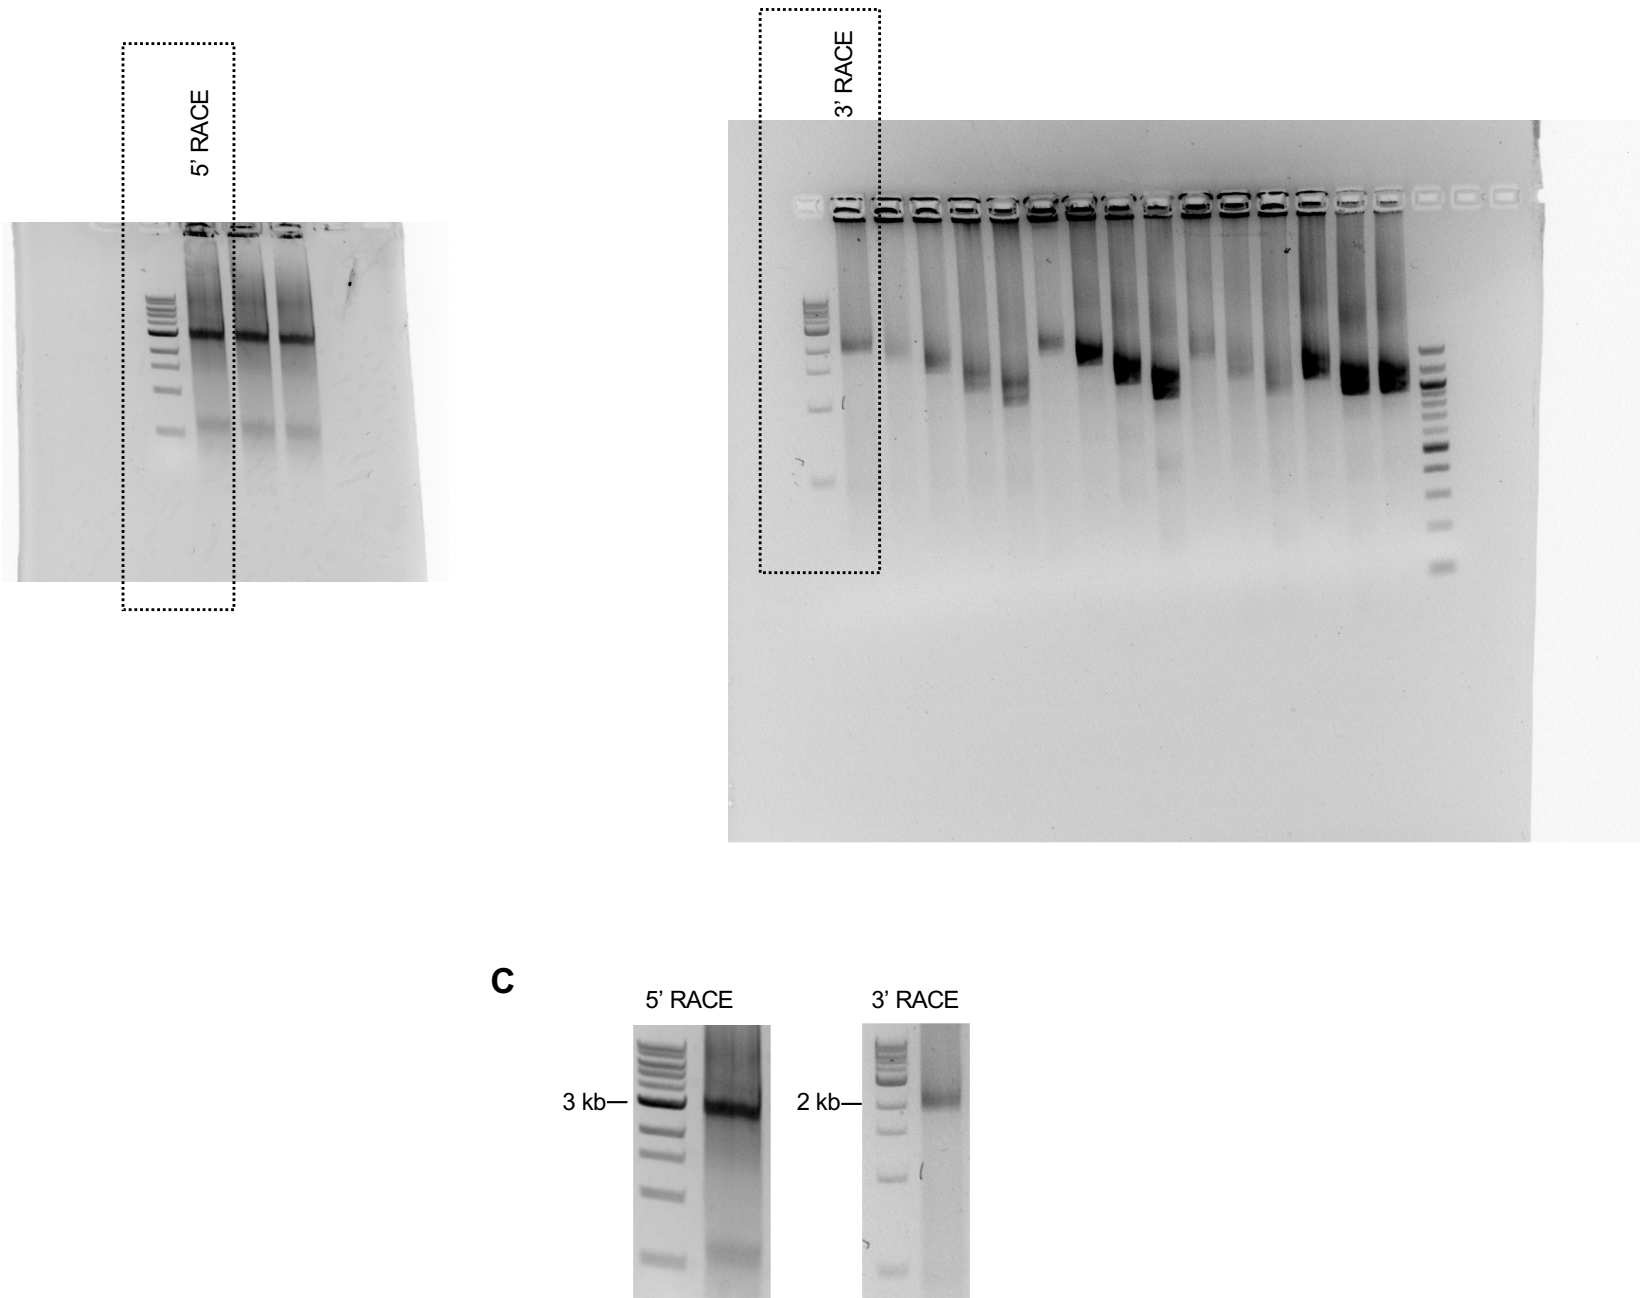

Figure 3

Supplement: fig3-data2 [file elife-91438-fig3-data2-v1.zip]

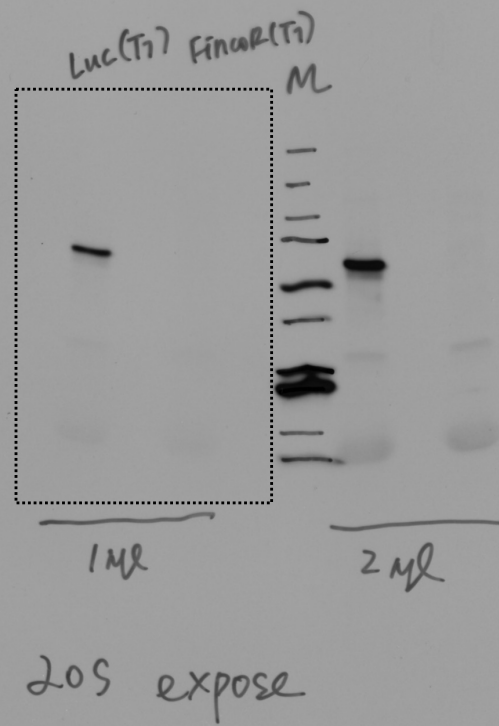

F in vitro translation

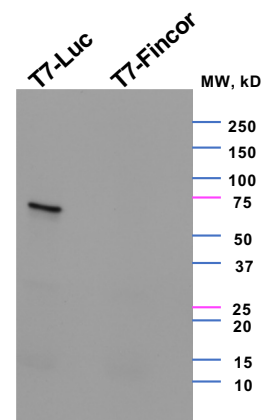

Figure 3

Supplement: fig3-data4 [file elife-91438-fig3-data4-v1.zip]

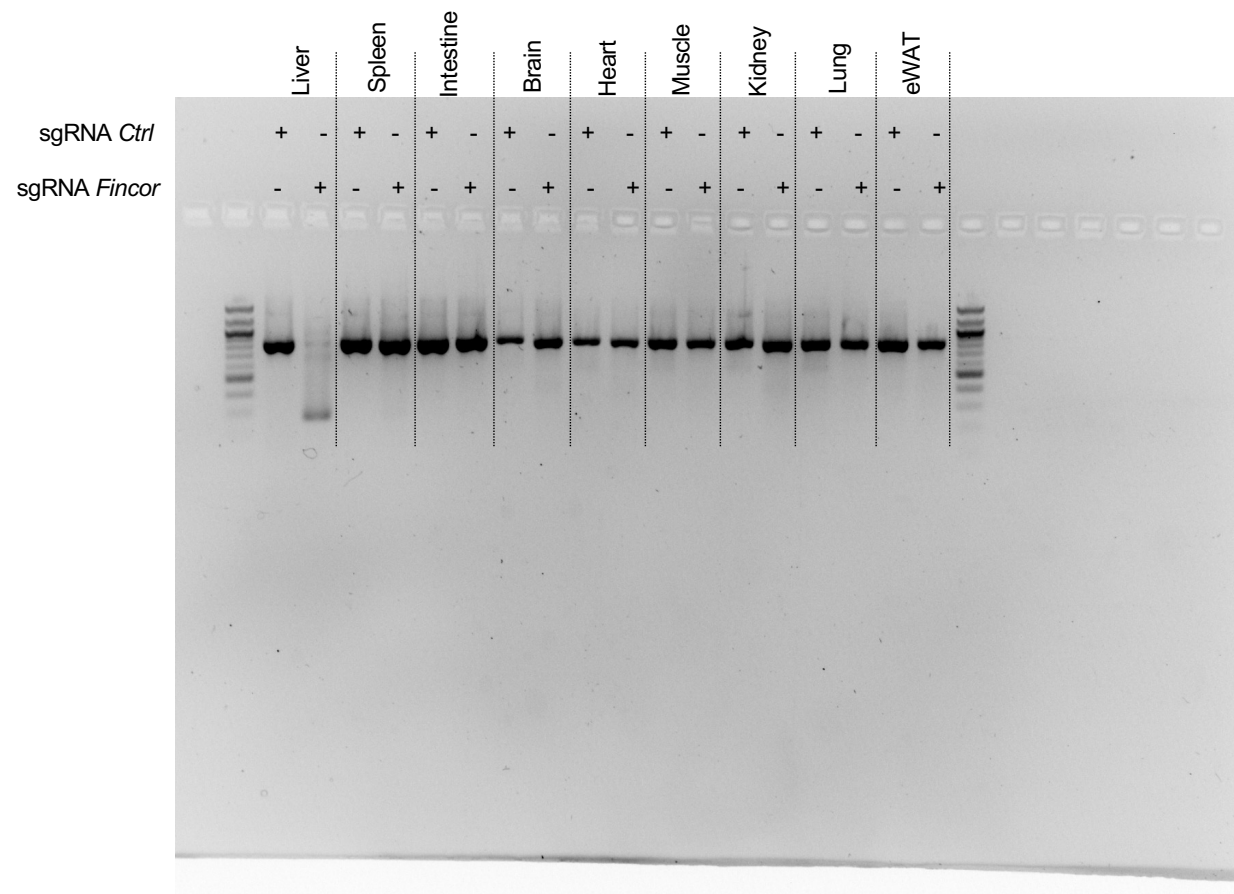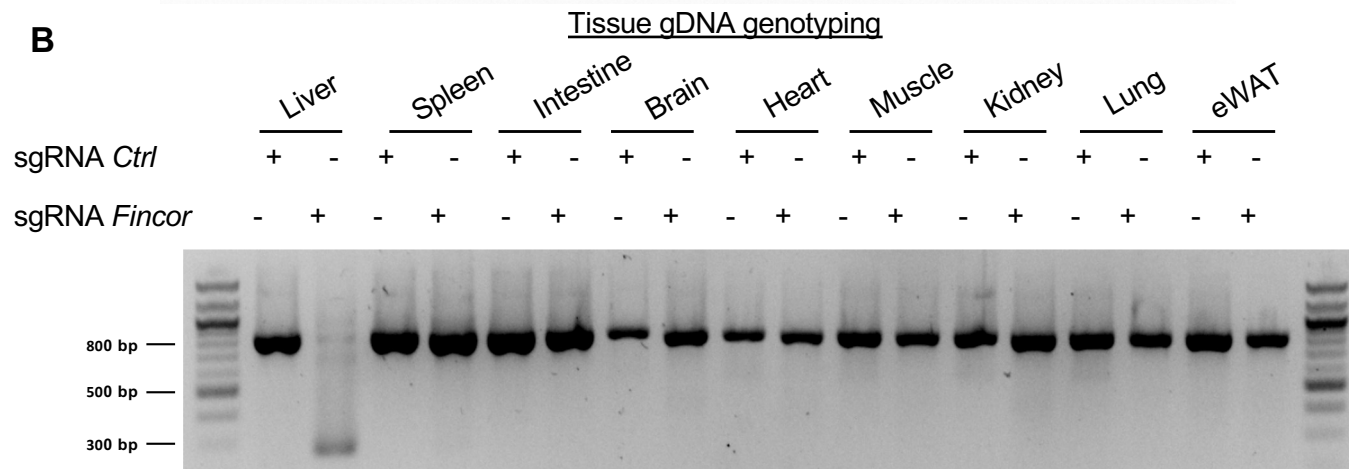

Figure 5-figure supplement 1

Supplement: fig5-figsupp1-data2 [file elife-91438-fig5-figsupp1-data2-v1.zip]
